# Supplementary material
Source: bioRxiv or medRxiv preprint supplement (https://medrxiv.org/highwire/filestream/86902/field_highwire_adjunct_files/6/2020.05.31.20118554-7.pdf)
Supplement: Supplementary file [file 2020.05.31.20118554-7.pdf]

| Cohort              | Characteristic            | P>0.5<br>n = 281 samples (0.9%) |              |              | P≤0.5<br>n = 31545 samples (99.1%) |              |              | Total<br>n = 31826 samples (100%) |              |              |
|---------------------|---------------------------|---------------------------------|--------------|--------------|------------------------------------|--------------|--------------|-----------------------------------|--------------|--------------|
|                     |                           | M                               | F            | Tot          | M                                  | F            | Tot          | M                                 | F            | Tot          |
| USZ<br>Samples      | Sample analysed - no.     | 83                              | 52           | 135          | 12296                              | 10694        | 22990        | 12379                             | 10746        | 23125        |
|                     | Median Age (IQR) - yr.    | 58 (48 - 67)                    | 54 (39 - 64) | 57 (43 - 66) | 58 (44 - 69)                       | 51 (36 - 66) | 55 (40 - 68) | 58 (44 - 69)                      | 51 (36 - 66) | 55 (40 - 68) |
| USZ<br>Patients     | Patient analysed - no.    | 78                              | 50           | 128          | 9909                               | 8900         | 18809        | 9987                              | 8950         | 18937        |
|                     | Median Age (IQR) - yr.    | 58 (46 - 67)                    | 53 (37 - 65) | 57 (42 - 66) | 57 (43 - 69)                       | 51 (36 - 66) | 55 (39 - 68) | 57 (43 - 69)                      | 51 (36 - 66) | 55 (39 - 68) |
| BDS<br>Samples*     | Sample analysed - no.     | 20                              | 20           | 40           | 1759                               | 1310         | 3069         | 1779                              | 1330         | 3109         |
|                     | Median Age (IQR) - yr.    | 46 (30 - 53)                    | 30 (26 - 42) | 40 (26 - 51) | 44 (31 - 55)                       | 39 (26 - 52) | 42 (29 - 53) | 44 (31 - 55)                      | 39 (26 - 52) | 42 (29 - 53) |
| Internal<br>Medicin | Sample analysed - no. (%) | 35                              | 21           | 56           |                                    |              | 90           |                                   |              | 146          |
|                     | Median Age (IQR) - yr.    | 63 (52 - 67)                    | 70 (55 - 80) | 63 (53 - 73) |                                    |              | NA           |                                   |              | NA           |

\*Based on age and gender of 3109 donors from April and May.

IQR = interquartile range
